# Supplementary material for: Swelling and delamination of inorganic homoionic montmorillonite clay in water–polar organic mixed solvents
Source: Royal Society of Chemistry journal article supplement (doi:10.1039/d4dt00192c), 2024-01-01
Supplement: d4dt00192c1.pdf [file d4dt00192c1.pdf]

## Electronic Supplementary Information

### **Swelling and delamination of inorganic homoionic montmorillonite clay in water–polar organic mixed solvents**

Teruyuki Nakato,<sup>a\*</sup> Munehiro Kubota,<sup>b</sup> Yuuki Otsuka,<sup>a</sup> Yuta Yane,<sup>a</sup> Kosei Orio,<sup>a</sup> Emiko Mouri,<sup>a</sup> Yusuke Yamauchi,<sup>c,d,e</sup> and Hirokatsu Miyata<sup>c</sup>

<sup>a</sup> Department of Applied Chemistry, Kyushu Institute of Technology, 1-1 Sensui-cho, Tobata, Kitakyushu, Fukuoka 804-8550, Japan.

<sup>b</sup> Kunimine Industries Co., Ltd., Iwaki, Fukushima 972-8312, Japan.

<sup>c</sup> Department of Materials Engineering, Nagoya University, Furo-cho, Chikusa, Nagoya 464-8603, Japan.

<sup>d</sup> School of Chemical Engineering and Australian Institute for Bioengineering and Nanotechnology (AIBN), The University of Queensland, Brisbane, Queensland 4072, Australia.

<sup>e</sup> Department of Chemical and Biomolecular Engineering, Yonsei University, 50 Yonsei-ro, Sodeaemun-gu, Seoul 03722, South Korea.

Figure S1

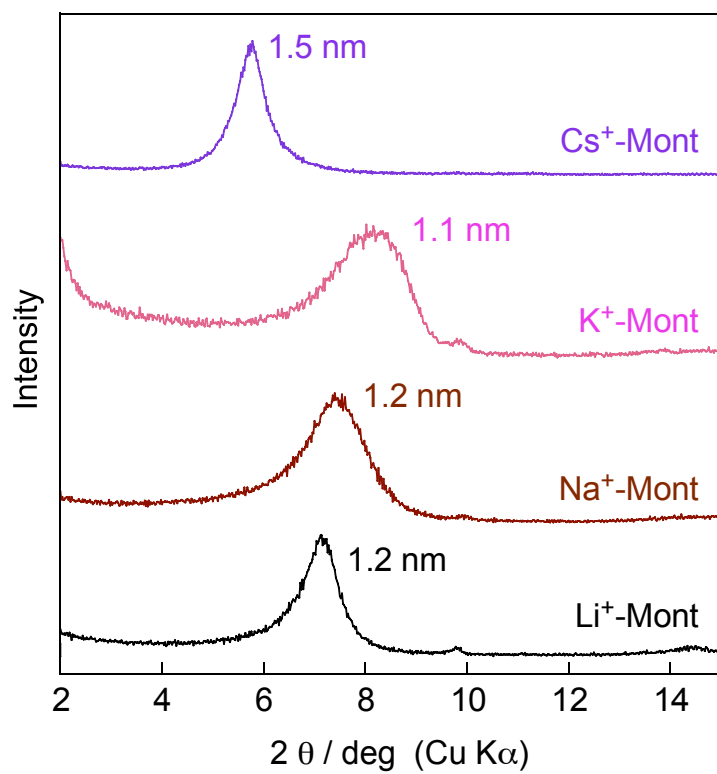

Powder XRD patterns of Li<sup>+</sup>-, Na<sup>+</sup>-, K<sup>+</sup>-, and Cs<sup>+</sup>-Mont.

Figure S2

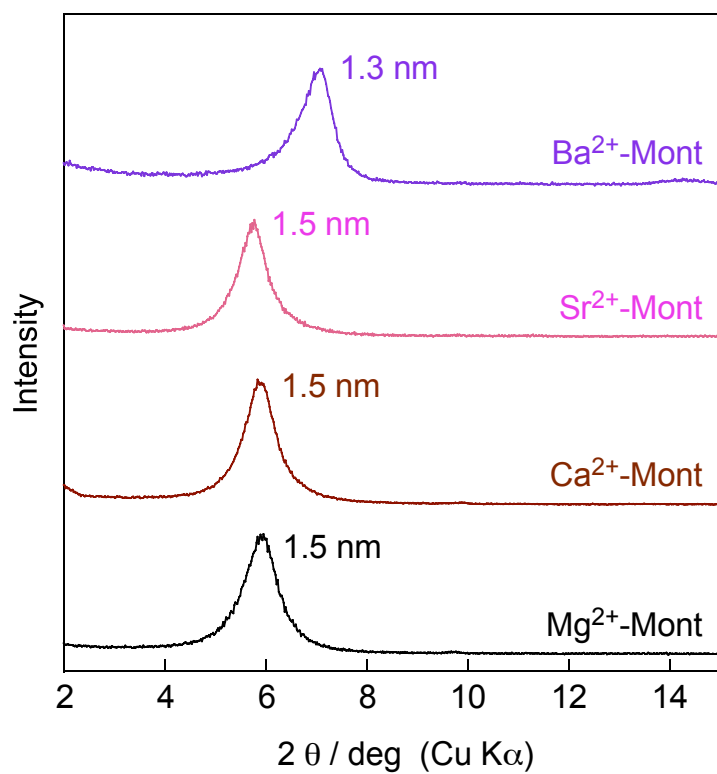

Powder XRD patterns of  $\text{Mg}^{2+}$ -,  $\text{Ca}^{2+}$ -,  $\text{Sr}^{2+}$ -, and  $\text{Ba}^{2+}$ -Mont.

Figure S3

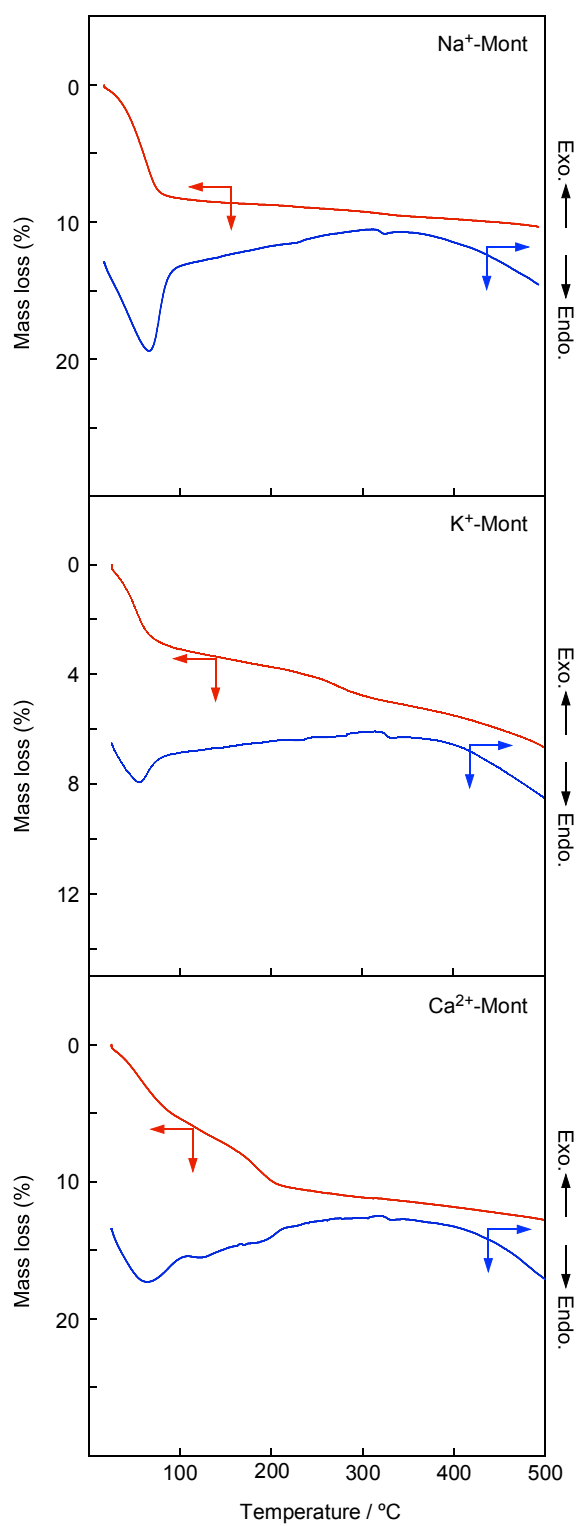

TG-DTA curves of Na<sup>+</sup>-, K<sup>+</sup>-, and Ca<sup>2+</sup>-Mont.
